# Supplementary material
Source: publisher figshare collection journal article supplement (https://acs.figshare.com/ndownloader/files/21705267)
Supplement: Supplementary file 1 [file 21705267]

# Nitrogen fixation with water vapor by non-equilibrium plasma: Towards sustainable ammonia production

*Yury Gorbanev, Elise Vervloessem, Anton Nikiforov, Annemie Bogaerts*

## **Supporting Information**

*Pages: 19*

*Figures: 11*

*Tables: 2*

## ***Table of contents***

|                                                                                                                                                                                                                                                                                    |        |
|------------------------------------------------------------------------------------------------------------------------------------------------------------------------------------------------------------------------------------------------------------------------------------|--------|
| Figure S1. Voltage and current waveforms of the ignited plasma.....                                                                                                                                                                                                                | p. s2  |
| Figure S2. Time-resolved imaging of the plasma of the plasma discharge.....                                                                                                                                                                                                        | p. s3  |
| T1 Plasma temperature measurements .....                                                                                                                                                                                                                                           | p. s3  |
| Figure S3. Rayleigh scattering spectroscopy setup .....                                                                                                                                                                                                                            | p. s5  |
| Table S1. Width and average temperature of the plasma effluent with different gas flow rates at various distances from the plasma jet nozzle.....                                                                                                                                  | p. s6  |
| Figure S4. Temperature measurements of the outer casing of the plasma jet.....                                                                                                                                                                                                     | p. s7  |
| Figure S5. Experimental setup with the air-free reactor.....                                                                                                                                                                                                                       | p. s8  |
| Figure S6. Experimental setup without direct plasma-liquid interaction.....                                                                                                                                                                                                        | p. s8  |
| T2 Materials.....                                                                                                                                                                                                                                                                  | p. s9  |
| Figure S7. Calibration curves for the measurement of $\text{NH}_3$ , $\text{NH}_2\text{OH}$ and $\text{NH}_2\text{NH}_2$ in liquid $\text{H}_2\text{O}$ samples.....                                                                                                               | p. s10 |
| T3 Measurements of $\text{NH}_3$ , $\text{NH}_2\text{OH}$ and $\text{NH}_2\text{NH}_2$ concentrations in the plasma-exposed water by colorimetry.....                                                                                                                              | p. s11 |
| T4 Selectivity of $\text{NH}_3$ , $\text{NH}_2\text{OH}$ and $\text{NH}_2\text{NH}_2$ colorimetric measurements in the plasma-exposed water.....                                                                                                                                   | p. s11 |
| Figure S8. Absorption signal at 637 nm produced by various concentrations of $\text{NH}_2\text{OH}$ using the LabAssay Ammonium Kit.....                                                                                                                                           | p. s13 |
| T5 Energy consumption calculation.....                                                                                                                                                                                                                                             | p. s13 |
| Table S2. Rate and selectivity of $\text{NH}_3$ production by the plasma jet as a function of $\text{H}_2\text{O}$ vapor content at different gas flow rates.....                                                                                                                  | p. s14 |
| T6 Calculation of $\Delta G$ values.....                                                                                                                                                                                                                                           | p. s15 |
| Figure S9. Concentration of $\text{NH}_3$ , $\text{NO}_2^-$ , $\text{NO}_3^-$ , and $\text{H}_2\text{O}_2$ in liquid $\text{H}_2\text{O}$ produced via $\text{N}_2$ fixation by plasma as a function of plasma exposure time.....                                                  | p. s15 |
| Figure S10. Concentration of $\text{NH}_3$ , $\text{NO}_3^-$ , $\text{NO}_2^-$ , and $\text{H}_2\text{O}_2$ in liquid $\text{H}_2\text{O}$ produced via $\text{N}_2$ fixation by plasma, with 1.4 L/min $\text{N}_2$ , as a function of $\text{H}_2\text{O}$ vapor saturation..... | p. s16 |
| Figure S11. Concentration of $\text{NH}_3$ , $\text{NO}_3^-$ , $\text{NO}_2^-$ by NTP in liquid water, as a function of water vapor saturation, with 0.2 L/min $\text{N}_2$ flow rate.....                                                                                         | p. s17 |
| References.....                                                                                                                                                                                                                                                                    | p. s18 |

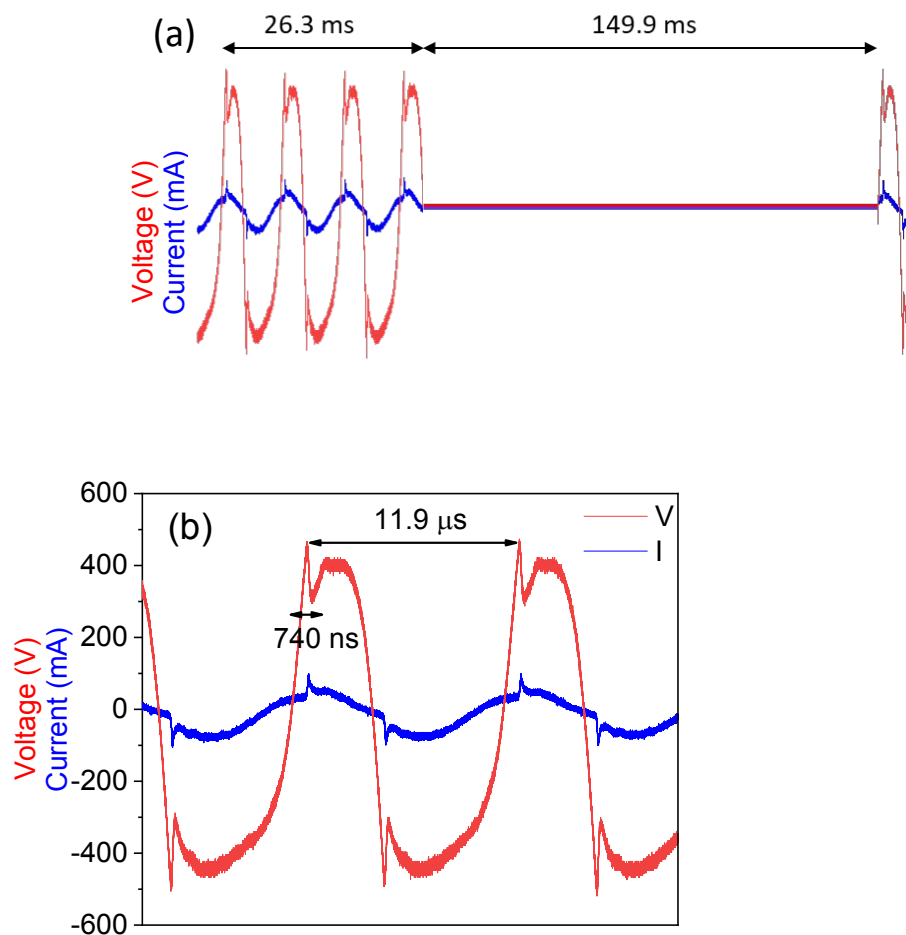

**Figure S1.** Voltage (V) and current (I) waveforms of the ignited plasma discharge, as measured using a voltage probe (Tektronix P6015A) and a current probe (Pearson Current Monitor 2877), connected to a LeCroy WaveSurfer 64Xs oscilloscope. (a) Schematic representation of the AC pulses (not to scale); (b) positions of the low current sparks within the AC pulses. The frequency of the AC pulses is ca. 6 Hz, and the frequency of the sparks within the AC pulses is 84 kHz. As the plasma was created only within the sparks (see below), the duty cycle of the plasma setup is 1.86%. This, together with integration of the product of V and I at the low current sparks, enables calculation of the power deposited into plasma, yielding 0.1 W.

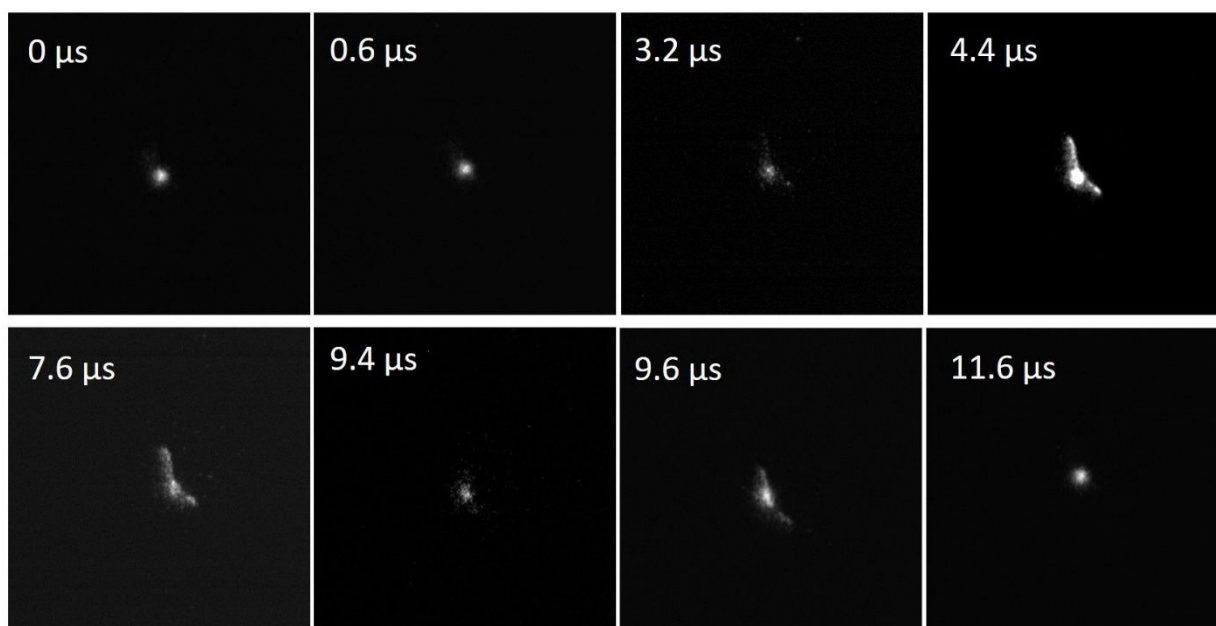

**Figure S2.** Time-resolved imaging of the plasma discharge obtained using a Hamamatsu C8484 ICCD camera<sup>1</sup> with a 100 ns exposure time. Time indication on the frames is shown in relation to the voltage crossing the zero value. The camera lens surface was perpendicular to the effluent. Plasma conditions: 0.7 L/min N<sub>2</sub> with 100% H<sub>2</sub>O vapor saturation. Two low current sparks are generated at 4.4 and 9.6 μs. The intensity (i.e., brightness on the images) of the signal decreases with time, until the next spark. The visible round shape zone of low light intensity appearing in between sparks corresponds to the afterglow emission.

### **T1 Plasma temperature measurements**

*Plasma core temperature by optical emission spectroscopy (OES).* In the case of non-equilibrium atmospheric pressure plasmas, the rotational temperature  $T_{\text{rot}}$  can be used as an indicator of the gas translational temperature due to the very high frequency of collisions, which leads to equilibrium between different rotational states of the colliding particles. Determination of  $T_{\text{rot}}$  assumed Boltzmann distribution of rotational/vibrational states. In this work, the OES

temperature measurements were based on relative intensity measurements of spectral lines of a second positive system of nitrogen  $N_2$   $C^3\Pi_u \rightarrow B^3\Pi_g$ <sup>2</sup>. The discharge emission was collected with fibre optics (diameter 600  $\mu\text{m}$ ) directly facing the region where bright electrical discharge is generated. Two spectrophotometers (Avantes AvaSpec-3048, 300-390 nm) were used to partially resolve rotational structure of the  $N_2$  bands. Spectrometers were calibrated with a 250-2400 nm halogen lamp. The rotational temperature was spatially and time averaged. MassiveOES software was used to fit the experimental and theoretical spectra, providing  $T_{\text{rot}}$  as a result of the fitting process as described in our recent work<sup>3</sup>.

*Plasma effluent by Rayleigh scattering spectroscopy (RSS).* The setup for RS measurements was adapted from our recent work<sup>4</sup> (Figure S3). This active spectroscopic method is typically used for gas temperature measurement since the Rayleigh scattering signal ( $I$ ) is proportional to the density of heavy scattered particles ( $n^i$ )<sup>5</sup>:  $I \sim \sum_i \sigma^i n^i = \sum_i \sigma^i \frac{p}{T_g k_B}$ , where  $k_B$  is the Boltzmann constant and  $\sigma^i$  is the RS cross-section of heavy species. Gas temperature  $T_g$  is calculated as the ratio of scattered laser light intensity  $I_{\text{ref}}$  corresponding to a known reference temperature  $T_{\text{ref}}$  (room temperature during the experiments) and scattered intensity when it passes through the plasma  $I_p$ :  $T_g = \frac{I_{\text{ref}}}{I_p} T_{\text{ref}}$ .

The laser scattering experiments were performed in ambient conditions, with a pulsed Litron nano-S Nd:YAG laser (wavelength 532 nm, pulse energy 12 mJ, repetition rate 10 Hz, pulse duration 8 ns). The laser beam had a Gaussian shape with a diameter of 0.5 mm. The scattered light was collected, perpendicularly to the laser beam, by a Hamamatsu C8484 ICCD camera with a 532 nm filter. The synchronization between the laser pulse and the ICCD camera was achieved by the delay generator DG535.

Note that in this work, OES and RSS were complementary: RSS was used to determine the temperature of the plasma jet effluent, while the emission for OES was mostly collected from the very bright region located directly inside the plasma jet nozzle corresponding to the active discharge region.

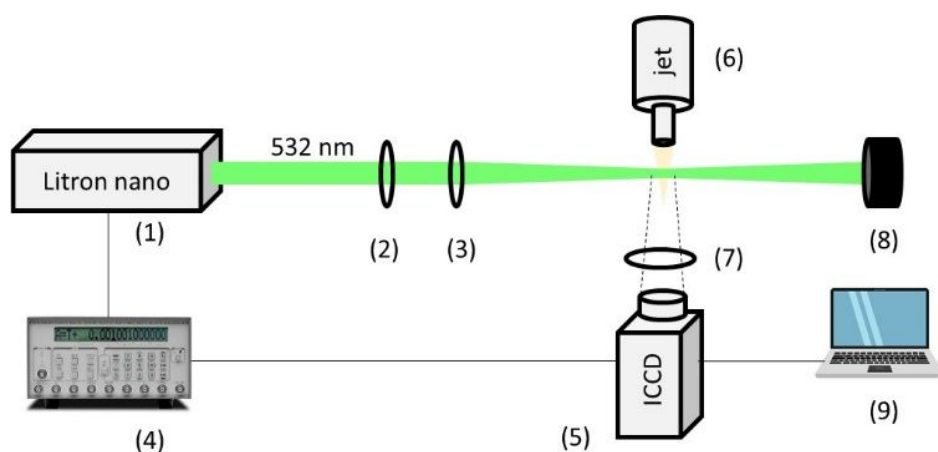

**Figure S3.** Rayleigh scattering spectroscopy setup including: Nd:YAG laser at 532 nm (1), polarizer (2), lens  $f=500$  mm (3), delay generator (4), ICCD camera (5), plasma jet (6), filter 532 nm (7), beam dump (8), PC with control software (9).

**Table S1.** Width and average temperature of the plasma effluent with different gas flow rates at various distances from the plasma jet nozzle, as measured by Rayleigh scattering spectroscopy.

| Entry                                                                                         | Distance from the jet (mm) | Feed gas flow rate (L/min) | H <sub>2</sub> O vapor saturation (%) | Effluent width (mm) | Effluent temperature* (°C) |
|-----------------------------------------------------------------------------------------------|----------------------------|----------------------------|---------------------------------------|---------------------|----------------------------|
| 1                                                                                             | 1.2                        | 0.2                        | -                                     | 1.2                 | 108                        |
| 2                                                                                             | 1.2                        | 0.35                       | -                                     | 1.0                 | 91                         |
| 3                                                                                             | 1.2                        | 0.7                        | -                                     | 0.9                 | 76                         |
| 4                                                                                             | 1.2                        | 1.4                        | -                                     | 0.8                 | 47                         |
| 5                                                                                             | 1.2                        | 0.2                        | 100                                   | 1.1                 | 115                        |
| 6                                                                                             | 1.2                        | 1.4                        | 100                                   | 0.9                 | 57                         |
| 7                                                                                             | 3.4                        | 0.2                        | -                                     | 1.8                 | 72                         |
| 8                                                                                             | 3.4                        | 0.35                       | -                                     | 1.6                 | 75                         |
| 9                                                                                             | 3.4                        | 0.7                        | -                                     | 1.3                 | 52                         |
| 10                                                                                            | 3.4                        | 1.4                        | -                                     | 1.0                 | 35                         |
| 11                                                                                            | 3.4                        | 0.2                        | 100                                   | 1.8                 | 71                         |
| 12                                                                                            | 3.4                        | 1.4                        | 100                                   | 1.0                 | 38                         |
| * The average error in the temperature values obtained using Rayleigh spectroscopy was 10 °C. |                            |                            |                                       |                     |                            |

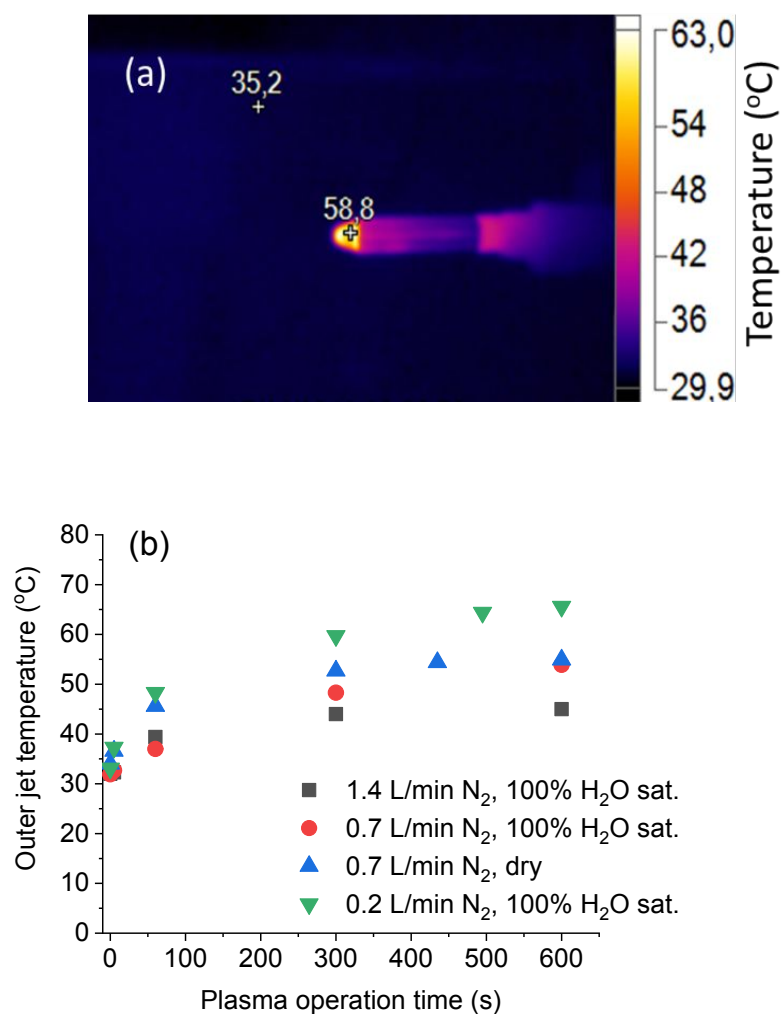

**Figure S4.** Temperature measurements of the outer casing of the plasma jet performed by imaging with a TiS45 Fluke IR camera. (a) A typical image obtained; (b) plasma jet outer casing temperature as a function of the plasma operation time.



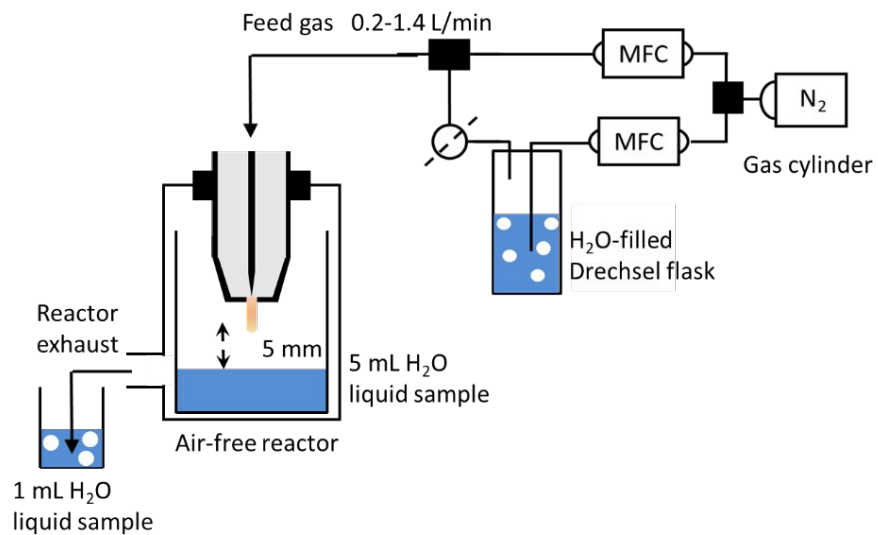

**Figure S5.** Experimental setup with the air-free reactor.

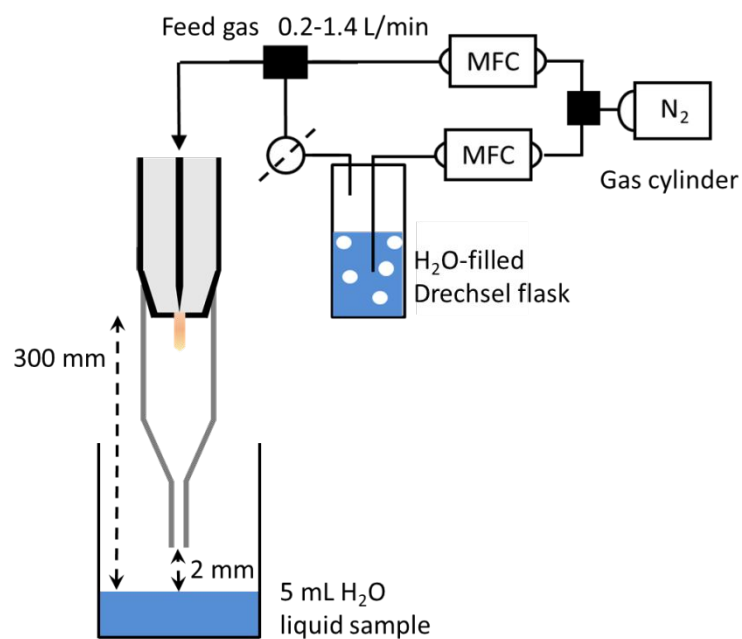

**Figure S6.** Experimental setup with the glass tube, eliminating the direct plasma-liquid interaction.

## T2 Materials

$\text{K}_2\text{TiO}(\text{C}_2\text{O}_4)_2 \cdot 2\text{H}_2\text{O}$  ( $\geq 98\%$ ),  $\text{H}_2\text{SO}_4$  (97%),  $\text{NaN}_3$  ( $\geq 98\%$ ),  $\text{H}_2\text{O}_2$  (30 wt%) used for  $\text{H}_2\text{O}_2$  measurements, and  $\text{HCl}$  (37%),  $\text{CH}_3\text{COOH}$  (100%),  $\text{NH}_4\text{Fe}(\text{SO}_4)_2 \cdot 12\text{H}_2\text{O}$ , 1,10-phenanthroline ( $\geq 99\%$ ),  $\text{NH}_2\text{OH}$  (50 wt%) for  $\text{NH}_2\text{OH}$  measurements, were purchased from Sigma.

Spectroquant Hydrazine Test Kit and  $\text{NH}_2\text{NH}_2 \cdot \text{H}_2\text{O}$  ( $\geq 99\%$ ) for  $\text{NH}_2\text{NH}_2$  analysis were obtained from VWR.

The Nitrate/Nitrite Colorimetric Assay Kit and LabAssay Ammonia Kit were purchased from Cayman Chemicals and Fujifilm Wako Pure Chemical Corporation, respectively.

$\text{D}_2\text{O}$  (99.9%) was from Sigma Aldrich.  $\text{N}_2$  (99.999%) and compressed air were supplied by Praxair.

De-ionized  $\text{H}_2\text{O}$  was used to prepare all solutions.

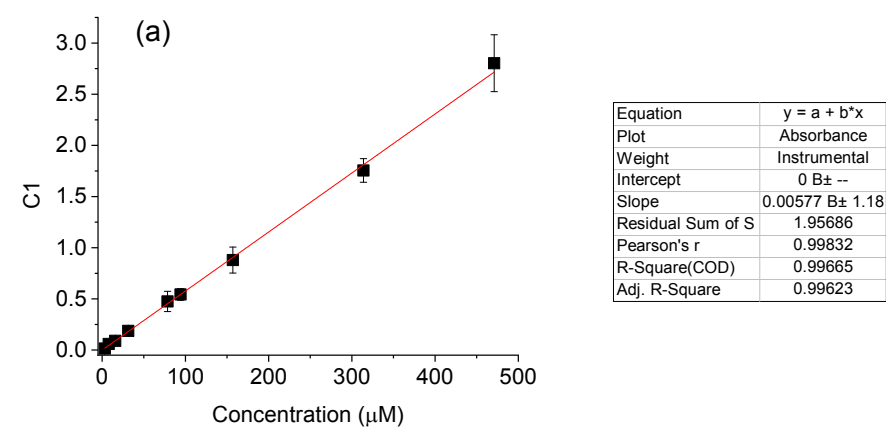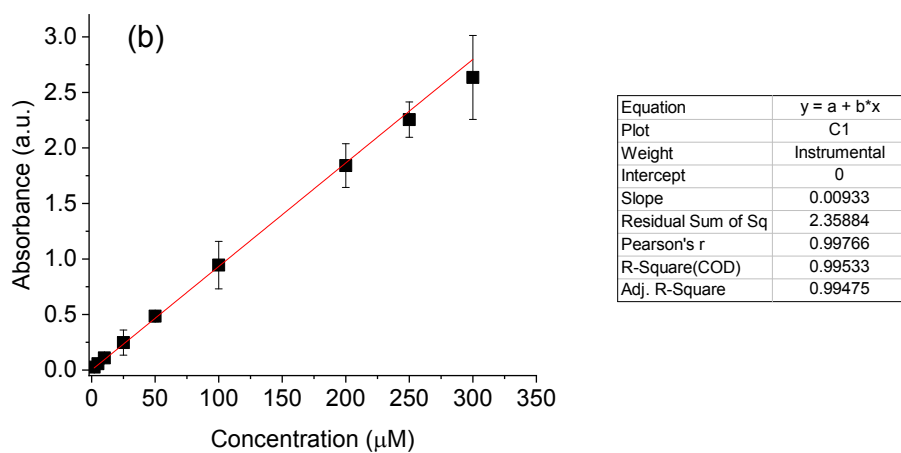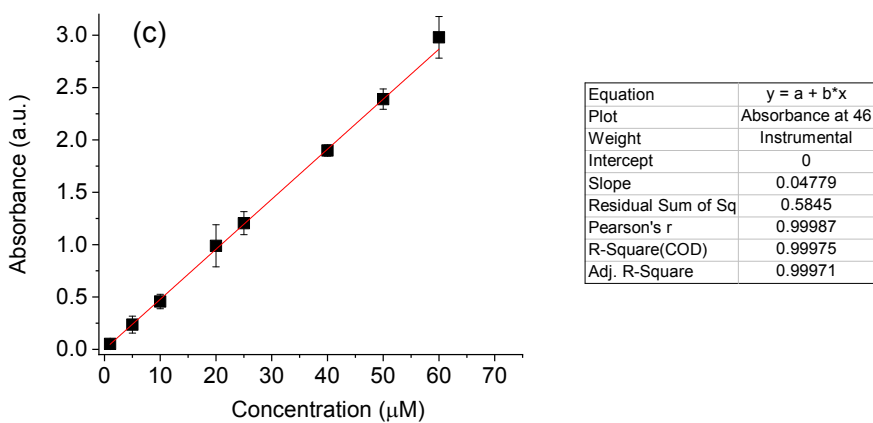

**Figure S7.** Calibration curves for the measurement of (a)  $\text{NH}_3$ , (b)  $\text{NH}_2\text{OH}$  and (c)  $\text{NH}_2\text{NH}_2$  in liquid  $\text{H}_2\text{O}$  samples.

### **T3 Measurements of $\text{NH}_3$ , $\text{NH}_2\text{OH}$ and $\text{NH}_2\text{NH}_2$ concentrations in the plasma-exposed water by colorimetry**

The measurements were performed on a UV-Vis Thermo Fischer Genesys 6 spectrophotometer using Hellma quartz cuvettes with a 10 mm path length.

*$\text{NH}_3$  measurement procedure:* 140  $\mu\text{L}$  of Chromogen A (from the LabAssay Ammonium kit) were mixed with 140  $\mu\text{L}$  of the  $\text{NH}_3$ -containing  $\text{H}_2\text{O}$  solution; after 30 min of incubation, 70  $\mu\text{L}$  of Chromogen B were added; after another 30 min of incubation, 140  $\mu\text{L}$  of Chromogen C were added, and the resulting mixture was incubated for 2 h. The absorbance was measured at the peak maximum of 637 nm.

*$\text{NH}_2\text{OH}$  measurement procedure:* 1.2 mL of the  $\text{NH}_2\text{OH}$ -containing solution was mixed with 100  $\mu\text{L}$  of a 5:6 mixture of 1 M  $\text{CH}_3\text{COONa}$  and 1 M  $\text{CH}_3\text{COOH}$ . Then, 100  $\mu\text{L}$  of 4 mM  $\text{NH}_4\text{Fe}(\text{SO}_4)_2 \cdot 12\text{H}_2\text{O}$  in 0.1 M HCl were added. After the solution was vigorously stirred for 2 min, 100  $\mu\text{L}$  of 1,10-phenanthroline in 0.1 M HCl were added, and the resulting mixture was incubated for 30 min. The absorbance was measured at the peak maximum of 510 nm.

*$\text{NH}_2\text{NH}_2$  measurement procedure:* 1 mL of the  $\text{NH}_2\text{NH}_2$ -containing solution was mixed with 100  $\mu\text{L}$  of the Hy-1 reagent from the Spectroquant Hydrazine Test Kit, and incubated for 10 min. The absorbance was measured at the peak maximum of 458 nm.

### **T4 Selectivity of $\text{NH}_3$ , $\text{NH}_2\text{OH}$ and $\text{NH}_2\text{NH}_2$ colorimetric measurements in the plasma-exposed water**

We performed extensive tests to determine the influence of possible other  $\text{N}_2$  fixation and plasma- $\text{H}_2\text{O}$  interaction products on the selectivity of the UV-Vis spectrophotometric analysis used. We cross-tested each of the species:  $\text{NH}_3$ ,  $\text{NH}_2\text{OH}$ , and  $\text{NH}_2\text{NH}_2$ , together with  $\text{NO}_2^-$ ,  $\text{NO}_3^-$

, and  $\text{H}_2\text{O}_2$  (i.e., all possible long-lived species in the plasma-exposed  $\text{H}_2\text{O}$ ).  $\text{NO}_2^-$  was added as  $\text{NaNO}_2$  (98%), and  $\text{NO}_3^-$  as  $\text{KNO}_3$  (99%), obtained from Alfa Aesar.

*$\text{NH}_3$  analysis selectivity with the LabAssay Ammonium kit.* The calibration curve of  $\text{NH}_3$  in absence of any other species is shown in Figure S7a. Of all tested species, only  $\text{NH}_2\text{OH}$  and  $\text{NH}_2\text{NH}_2$  exhibited a potential to directly interfere with the colorimetric analysis: they both produced an absorbance peak with a maximum at 637 nm.  $\text{NH}_2\text{OH}$  gave much stronger interference than  $\text{NH}_2\text{NH}_2$ . Here, 1 mM concentration of commercial  $\text{NH}_2\text{NH}_2$  gave an absorption signal of ca. 0.040 a.u. This would correspond to 7  $\mu\text{M}$  of  $\text{NH}_3$  (Figure S7a). Therefore, unless  $\text{NH}_2\text{NH}_2$  is produced in very large quantities, its interference can be disregarded. At the same time,  $\text{NH}_2\text{OH}$  gave much stronger absorption values, as shown in Figure S8. Therefore,  $\text{NH}_2\text{OH}$  concentrations must be measured, and included in the calculation of  $\text{NH}_3$  concentrations. However, we note that in our experiments we did not observe any  $\text{NH}_2\text{NH}_2$  or  $\text{NH}_2\text{OH}$  in  $\text{H}_2\text{O}$  after the plasma exposure (see below).

The overall analysis is based on the modified method developed by Ito et al.<sup>6</sup>  $\text{NH}_3$  is converted to dioxydiphenylamine (DODPA) via the reaction with phenol and  $\text{Na}[\text{Fe}(\text{CN})_5\text{NO}]$ . DODPA is further oxidized to indophenol blue by  $\text{ClO}^-$ .  $\text{H}_2\text{O}_2$  and  $\text{NO}_2^-$  in the plasma-exposed  $\text{H}_2\text{O}$  could react with  $\text{ClO}^-$ <sup>7</sup> which is added as one of the Chromogens in the kit. However,  $\text{ClO}^-$  is added in a large excess, making the chosen method suitable for our experiments.

*$\text{NH}_2\text{OH}$  analysis selectivity.* The only interference was from  $\text{H}_2\text{O}_2$ . However, the absorbance signal at 510 created in the analysis method by 1 mM  $\text{H}_2\text{O}_2$  was ca. 0.051 a.u., corresponding to 5.5  $\mu\text{M}$   $\text{NH}_2\text{OH}$  (Figure S7b). In all our experiments, the concentration of  $\text{H}_2\text{O}_2$  did not exceed ca. 50  $\mu\text{M}$  (see Figure 2 in the main text). In any case, we did not detect any absorbance peaks at 510 nm when analysing the plasma-exposed  $\text{H}_2\text{O}$  solutions. However,  $\text{NH}_2\text{OH}$  can react with

$\text{NO}_2^-$ <sup>8</sup>. Thus, although we cannot exclude that some  $\text{NH}_2\text{OH}$  can be produced in situ during the plasma exposure, it is lost in a reaction with  $\text{NO}_2^-$ .

We explicitly note that the selectivity reported in our work is based on the final concentrations of the  $\text{N}_2$  fixation products in  $\text{H}_2\text{O}$ , after the plasma exposure.

*$\text{NH}_2\text{NH}_2$  analysis selectivity with the Spectroquant Hydrazine Test Kit.* We did not observe any detectable analysis interferences for  $\text{NH}_2\text{NH}_2$ . Furthermore, in analysis of all experiments we did not observe the induction of an absorbance peak at 458 nm, i.e., no  $\text{NH}_2\text{NH}_2$  was detected.

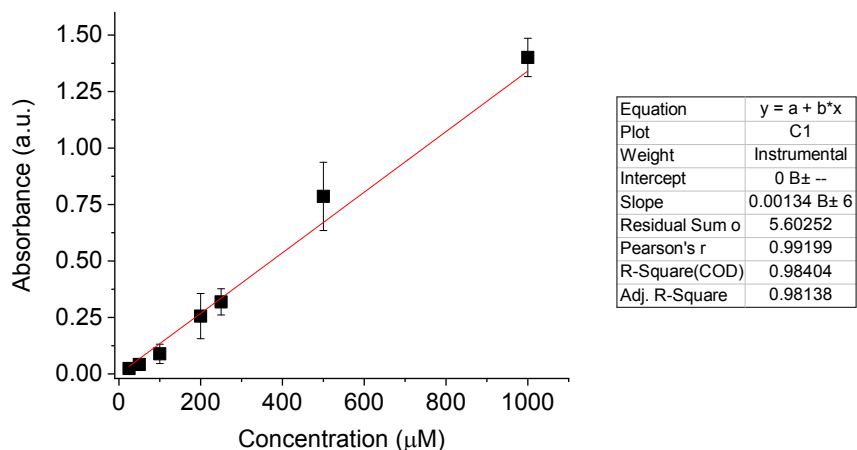

**Figure S8.** Absorption signal at 637 nm produced by various concentrations of  $\text{NH}_2\text{OH}$  using the LabAssay Ammonium Kit.

### T5 Energy consumption calculation

The power deposited in the plasma (DP) was 0.1 W (see Figures S1 and S2 above). The conditions which allow highest  $\text{NH}_3$  selectivity were 0.2 L/min  $\text{N}_2$ , with 5-10%  $\text{H}_2\text{O}$  vapor saturation. Under these conditions, the production rate (PR) of  $\text{NH}_3$  was 0.052-0.064 mg/h (Table S2). The energy consumption (EC) is calculated as  $\text{EC (J/mol)} = \frac{\text{DP (W)}}{\text{PR (mg/h)}} \times 3600 \left( \frac{\text{s}}{\text{h}} \right) \times 17000 \left( \frac{\text{mg}}{\text{mol}} \right)$ . Under the conditions mentioned above, EC was 95-118 MJ/mol  $\text{NH}_3$ .

**Table S2.** Rate and selectivity of NH<sub>3</sub> production, and conversion of N<sub>2</sub>, by the plasma jet as a function of H<sub>2</sub>O vapor content at different gas flow rates.

| Entry                                                                                                                                                                                                                         | Feed gas flow rate (L/min) | H <sub>2</sub> O vapor saturation (%) | NH <sub>3</sub> production rate (mg/h) | NH <sub>3</sub> selectivity (%)* | N <sub>2</sub> conversion (%)** |
|-------------------------------------------------------------------------------------------------------------------------------------------------------------------------------------------------------------------------------|----------------------------|---------------------------------------|----------------------------------------|----------------------------------|---------------------------------|
| 1                                                                                                                                                                                                                             | 0.2                        | -                                     | 0.031                                  | 88                               | 0.0004                          |
| 2                                                                                                                                                                                                                             |                            | 2                                     | 0.044                                  | 95                               | 0.0006                          |
| 3                                                                                                                                                                                                                             |                            | 5                                     | 0.052                                  | 96                               | 0.0007                          |
| 4                                                                                                                                                                                                                             |                            | 10                                    | 0.064                                  | 95                               | 0.0008                          |
| 5                                                                                                                                                                                                                             |                            | 20                                    | 0.078                                  | 86                               | 0.0011                          |
| 6                                                                                                                                                                                                                             |                            | 50                                    | 0.107                                  | 65                               | 0.0020                          |
| 7                                                                                                                                                                                                                             |                            | 100                                   | 0.124                                  | 63                               | 0.0023                          |
| 8                                                                                                                                                                                                                             | 0.35                       | -                                     | 0.031                                  | 86                               | 0.0002                          |
| 9                                                                                                                                                                                                                             |                            | 2                                     | 0.037                                  | 93                               | 0.0003                          |
| 10                                                                                                                                                                                                                            |                            | 5                                     | 0.053                                  | 94                               | 0.0004                          |
| 11                                                                                                                                                                                                                            |                            | 10                                    | 0.063                                  | 93                               | 0.0005                          |
| 12                                                                                                                                                                                                                            |                            | 20                                    | 0.077                                  | 81                               | 0.0007                          |
| 13                                                                                                                                                                                                                            |                            | 50                                    | 0.135                                  | 68                               | 0.0014                          |
| 14                                                                                                                                                                                                                            |                            | 100                                   | 0.153                                  | 65                               | 0.0016                          |
| 15                                                                                                                                                                                                                            | 0.7                        | -                                     | 0.032                                  | 78                               | 0.0001                          |
| 16                                                                                                                                                                                                                            |                            | 2                                     | 0.036                                  | 88                               | 0.0001                          |
| 17                                                                                                                                                                                                                            |                            | 5                                     | 0.058                                  | 91                               | 0.0002                          |
| 18                                                                                                                                                                                                                            |                            | 10                                    | 0.072                                  | 89                               | 0.0003                          |
| 19                                                                                                                                                                                                                            |                            | 20                                    | 0.074                                  | 87                               | 0.0003                          |
| 20                                                                                                                                                                                                                            |                            | 50                                    | 0.169                                  | 65                               | 0.0009                          |
| 21                                                                                                                                                                                                                            |                            | 100                                   | 0.184                                  | 63                               | 0.0010                          |
| 22                                                                                                                                                                                                                            | 1.4                        | -                                     | 0.029                                  | 73                               | 0.0001                          |
| 23                                                                                                                                                                                                                            |                            | 2                                     | 0.038                                  | 86                               | 0.0001                          |
| 24                                                                                                                                                                                                                            |                            | 5                                     | 0.064                                  | 88                               | 0.0001                          |
| 25                                                                                                                                                                                                                            |                            | 10                                    | 0.072                                  | 84                               | 0.0001                          |
| 26                                                                                                                                                                                                                            |                            | 20                                    | 0.096                                  | 83                               | 0.0002                          |
| 27                                                                                                                                                                                                                            |                            | 50                                    | 0.216                                  | 66                               | 0.0006                          |
| 28                                                                                                                                                                                                                            |                            | 100                                   | 0.263                                  | 64                               | 0.0007                          |
| *Calculated as $\frac{C(\text{NH}_3) \text{ mol/L}}{C(\text{NH}_3 + \text{NO}_2^- + \text{NO}_3^-) \text{ mol/L}} \times 100 \%$ .                                                                                            |                            |                                       |                                        |                                  |                                 |
| **Calculated as $\frac{C(\text{NH}_3 + \text{NO}_2^- + \text{NO}_3^-) \text{ mol/L}}{10 \text{ min}} \times \frac{5 \text{ mL}}{1000 \text{ mL/L}} \times 24.5 \text{ L/mol} \times \frac{1}{\text{FR L/min}} \times 100\%$ , |                            |                                       |                                        |                                  |                                 |
| where FR is the flow rate of the gas. This is based on the assumption that all N <sub>2</sub> fixation products are converted into NH <sub>3</sub> , NO <sub>2</sub> <sup>-</sup> , or NO <sub>3</sub> <sup>-</sup> .         |                            |                                       |                                        |                                  |                                 |

## T6 Calculation of $\Delta G$ values

The values of  $\Delta G$  for the reaction  $2\text{N}_2 + 6\text{H}_2\text{O} \rightarrow 3\text{O}_2 + 4\text{NH}_3$  were calculated as shown below using the data from literature<sup>9</sup>. The calculation was based on the following assumptions: 1) the reactions occur in the gas phase, with all reactants and products in the gaseous state; 2)  $C_p$  is constant within the used temperature range; 3) partial pressures of the products were estimated from the stoichiometry of the reaction and the conversion values of  $\text{N}_2$  (see Table S2). The values of  $\Delta G$  were calculated for two ‘envelope’ conditions: 298 K, and the highest measured temperature in our plasma system (1623 K). The  $\Delta G$  values at all other possible temperature values belong to this range.

At 298 K,  $\Delta G^0 = \Delta G_f^0 (\text{NH}_3) \times 4 - \Delta G_f^0 (\text{H}_2\text{O}) \times 6 + RT \ln K = \text{ca. } 1.2 \text{ MJ/mol}$ , where  $K = P_{\text{O}_2}^3 \times P_{\text{NH}_3}^4 / (P_{\text{H}_2\text{O}}^6 \times P_{\text{N}_2}^2)$ . At other temperatures,  $\Delta H_f$  and  $S$  values of each compound were calculated as  $\Delta H_f^0 + C_p \Delta T$ , and  $S^0 + C_p \ln(T/298)$ , respectively.  $\Delta G$  was calculated as  $\Delta H_f - T \times \Delta S + RT \ln K$ . At 1623 K,  $\Delta G$  is 0.9 MJ/mol.

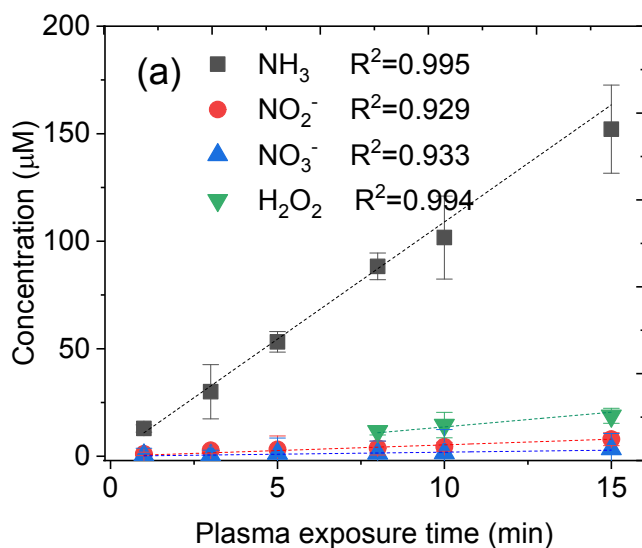



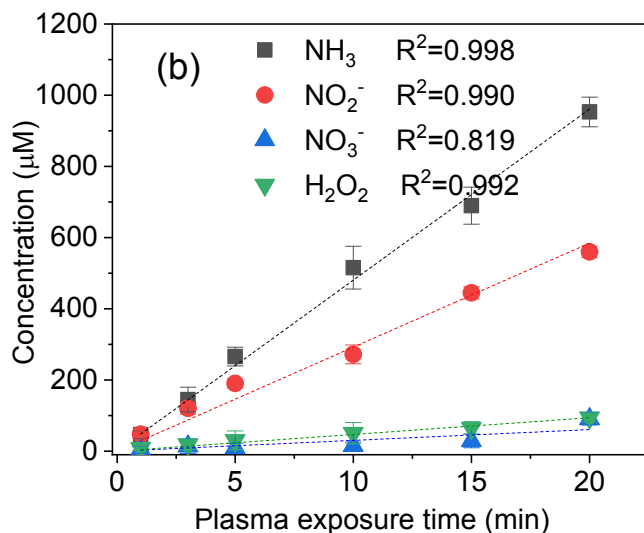

**Figure S9.** Concentration of the produced NH<sub>3</sub>, NO<sub>2</sub><sup>-</sup>, NO<sub>3</sub><sup>-</sup>, and H<sub>2</sub>O<sub>2</sub> in liquid H<sub>2</sub>O as a function of plasma exposure time. Plasma conditions: (a) 0.2 L/min N<sub>2</sub>, 5% H<sub>2</sub>O vapor saturation; (b) 1.4 L/min N<sub>2</sub>, 100% H<sub>2</sub>O vapor saturation. Liquid volume 5 mL, distance from plasma jet to liquid 5 mm. R<sup>2</sup> values are given for linear  $y=kx$  fittings.

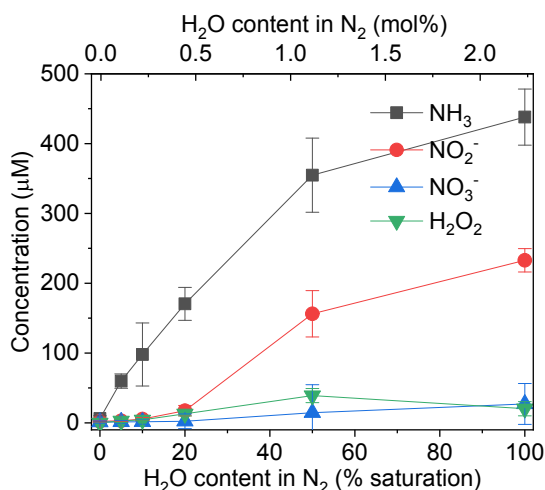

**Figure S10.** Concentration of the produced NH<sub>3</sub>, NO<sub>3</sub><sup>-</sup>, NO<sub>2</sub><sup>-</sup>, and H<sub>2</sub>O<sub>2</sub> in liquid H<sub>2</sub>O with 1.4 L/min N<sub>2</sub>, as a function of H<sub>2</sub>O vapor saturation. Liquid volume 5 mL, distance from plasma jet to liquid 300 mm, exposure time 10 min. This Figure corresponds to Figure 5 (main text), but at a higher flow rate.

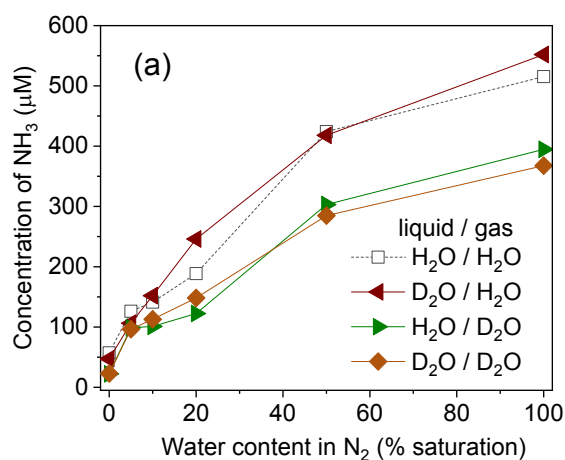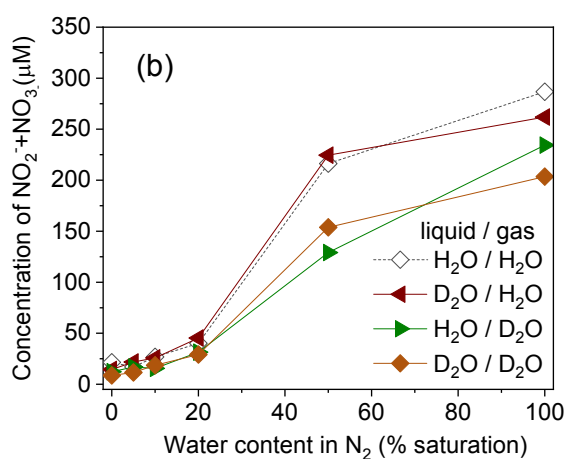

**Figure S11.** Concentration of NH<sub>3</sub>, NO<sub>3</sub><sup>-</sup>, NO<sub>2</sub><sup>-</sup>, as a function of water vapor saturation, with 1.4 L/min N<sub>2</sub> flow rate. (a) NH<sub>3</sub> concentration; (b) total NO<sub>2</sub><sup>-</sup>+NO<sub>3</sub><sup>-</sup> concentration. Liquid volume 5 mL, distance from plasma jet to liquid 5 mm, exposure time 10 min. Experimental data with H<sub>2</sub>O liquid and H<sub>2</sub>O vapor were added here as dashed lines for comparison. This Figure corresponds to Figure 6 (main text), but at a higher flow rate.

## REFERENCES

1. Xiong, Q.; Nikiforov, A. Y.; Lu, X. P.; Leys, C., High-speed dispersed photographing of an open-air argon plasma plume by a grating-ICCD camera system. *J. Phys. D: Appl. Phys.* **2010**, *43* (41), 415201-415210. DOI: 10.1088/0022-3727/43/41/415201.
2. Herzberg, G., *Spectra of Diatomic Molecules*. Krieger Publishing Company: Malabar, Florida, USA, 1989.
3. Sremački, I.; Gromov, M.; Leys, C.; Morent, R.; Snyders, R.; Nikiforov, A., An atmospheric pressure non-self-sustained glow discharge in between metal/metal and metal/liquid electrodes. *Plasma Process. Polym.* **2019**, DOI: 10.1002/ppap.201900191.
4. Barletta, F.; Leys, C.; Colombo, V.; Gherardi, M.; Britun, N.; Snyders, R.; Nikiforov, A., Insights in plasma-assisted polymerization at atmospheric pressure by spectroscopic diagnostics. *Plasma Process. Polym.* **2019**, DOI: 10.1002/ppap.201900174.
5. Miles, R. B.; Lempert, W. R.; Forkey, J. N., Laser Rayleigh scattering. *Meas. Sci. Technol.* **2001**, *12* (5), R33-R51. DOI: 10.1088/0957-0233/12/5/201.
6. Ito, S.; Takaoka, T.; Kishi, S.; Okuda, H.; Fujii, S., Studies of the clinical application of serum leucine aminopeptidase (LAP) activity determined with leucinamide as substrate. *Gastroenter. Jpn.* **1975**, *10* (1), 20-28. DOI: 10.1007/bf02775920.
7. Jirásek, V.; Lukeš, P., Formation of reactive chlorine species in saline solution treated by non-equilibrium atmospheric pressure He/O<sub>2</sub> plasma jet. *Plasma Sources Sci. Technol.* **2019**, *28* (3), 035015-035038. DOI: 10.1088/1361-6595/ab0930.
8. Bothner-By, A.; Friedman, L., The Reaction of Nitrous Acid with Hydroxylamine. *J. Chem. Phys.* **1952**, *20* (3), 459-462. DOI: 10.1063/1.1700442.

9. Wagman, D. D.; Evans, W. H.; Parker, V. B.; Schumm, R. H.; Halow, I.; Bailey, S. M.; Churney, K. L.; Nuttall, R. L., The NBS tables of chemical thermodynamic properties. *J. Phys. Chem. Ref. Data* **1982**, *11*, suppl. 2.
